# Supplementary material
Source: Research Square preprint supplement (doi:10.21203/rs.3.rs-9999401/v1)
Supplement: Supplementary file 1 [file 9201a0ea4eb5dd1f2d82b23b.docx]

# Appendix 1

Table 1 Regions Implementing Green Credit Interest Subsidy Policies

| **Province** | **City** | **Year of Policy Implementation** |
| --- | --- | --- |
| Sichuan Province | Dazhou | 2018 |
| Guangyuan | 2018 |
| Ya'an | 2018 |
| Nanchong | 2018 |
| Guang'an | 2018 |
| Neijiang | 2018 |
| Deyang | 2018 |
| Bazhong | 2018 |
| Chengdu | 2018 |
| Liangshan Yi Autonomous Prefecture | 2022 |
| Fujian Province | Fuzhou | 2018 |
| Zhangzhou | 2017 |
| Sanming | 2017 |
| Putian | 2019 |
| Quanzhou | 2019 |
| Xiamen | 2018 |
| Nanping | 2017 |
| Longyan | 2019 |
| Ningde | 2017 |
| Jiangsu Province | Nantong | 2017 |
| Nanjing | 2020 |
| Taixing | 2018 |
| Gaoyou | 2023 |
| Yangzhou | 2021 |
| Suzhou | 2019 |
| Shandong Province | Yantai | 2022 |
| Weihai | 2022 |
| Jinan | 2022 |
| Zaozhuang | 2020 |
| Anhui Province | Hefei | 2021 |
| Huangshan | 2017 |
| Anqing | 2018 |
| Chuzhou | 2023 |
| Gansu Province | Wuwei | 2018 |
| Lanzhou | 2020 |
| Tianshui | 2018 |
| Longnan | 2018 |
| Zhejiang Province | Huzhou | 2017 |
| Lishui | 2019 |
| Quzhou | 2019 |
| Wenzhou | 2020 |
| Hebei Province | Baoding | 2017 |
| Shijiazhuang | 2017 |
| Handan | 2018 |
| Guangdong Province | Shenzhen | 2018 |
| Guangzhou | 2019 |
| Qingyuan | 2018 |
| Guangxi Zhuang Autonomous Region | Hezhou | 2019 |
| Guilin | 2022 |
| Liuzhou | 2019 |
| Jiangxi Province | Fuzhou | 2018 |
| Pingxiang | 2017 |
| Hubei Province | Huangshi | 2018 |
| Xianning | 2019 |
| Ningxia Hui Autonomous Region | Yinchuan | 2022 |
| Shizuishan | 2023 |
| Jilin Province | Jilin | 2022 |
| Siping | 2023 |
| Liaoning Province | Yingkou | 2022 |
| Tianjin Municipality | Tianjin | 2022 |
| Beijing Municipality | Beijing | 2017 |
| Hunan Province | Yongzhou | 2023 |
| Chongqing Municipality | Chongqing | 2017 |
| Shanghai Municipality | Shanghai | 2021 |
| Shaanxi Province | Ankang | 2016 |
| Henan Province | Nanyang | 2018 |
| Shanxi Province | Datong | 2023 |
| Inner Mongolia Autonomous Region | Ordos | 2019 |
| Xinjiang Uygur Autonomous Region | Ili Kazakh Autonomous Prefecture | 2018 |

# Appendix 2

Heterogeneity in Treatment Effects.

Table 2 Bacon Test

| Types of Control Groups | Share of Green Patents | | Share of Green Invention Patents | |
| --- | --- | --- | --- | --- |
| Weight Estimate | Weight Estimate | Weight Estimate | Weight Estimate |
| Early treatment group vs. late control group | 0.074 | 0.553 | 0.074 | 0.429 |
| Late treatment group vs. early control group | 0.048 | -0.139 | 0.048 | -0.303 |
| Treatment group vs. never-policy group | 0.757 | 0.592 | 0.757 | 0.659 |
| Treatment group vs. always-policy group | 0.121 | -2.789 | 0.121 | -1.798 |
| DID weighted estimation results | 0.144 | | 0.298 | |

# Appendix 3

Test for parallel trends in a three-difference model.


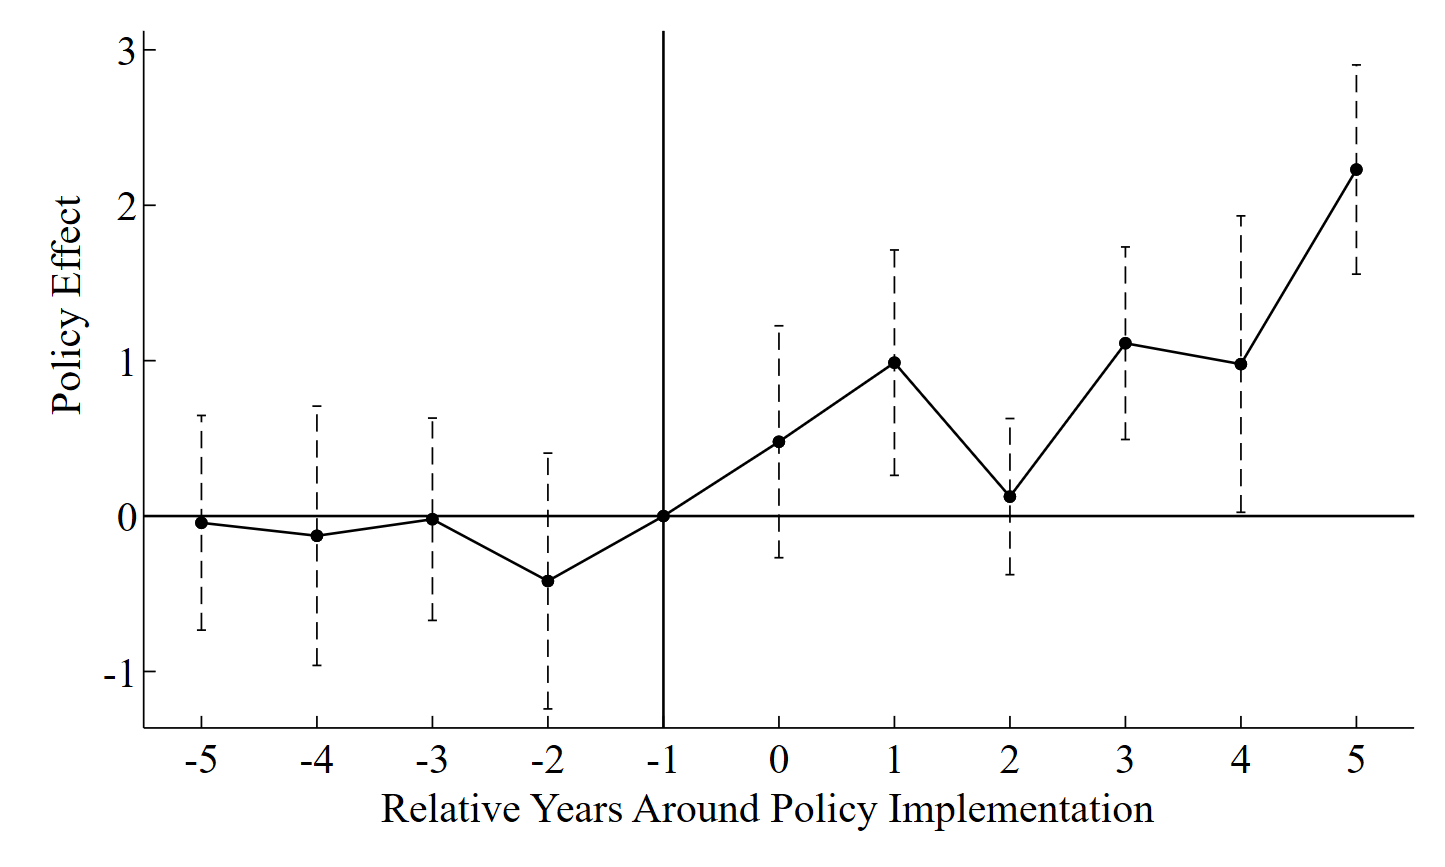

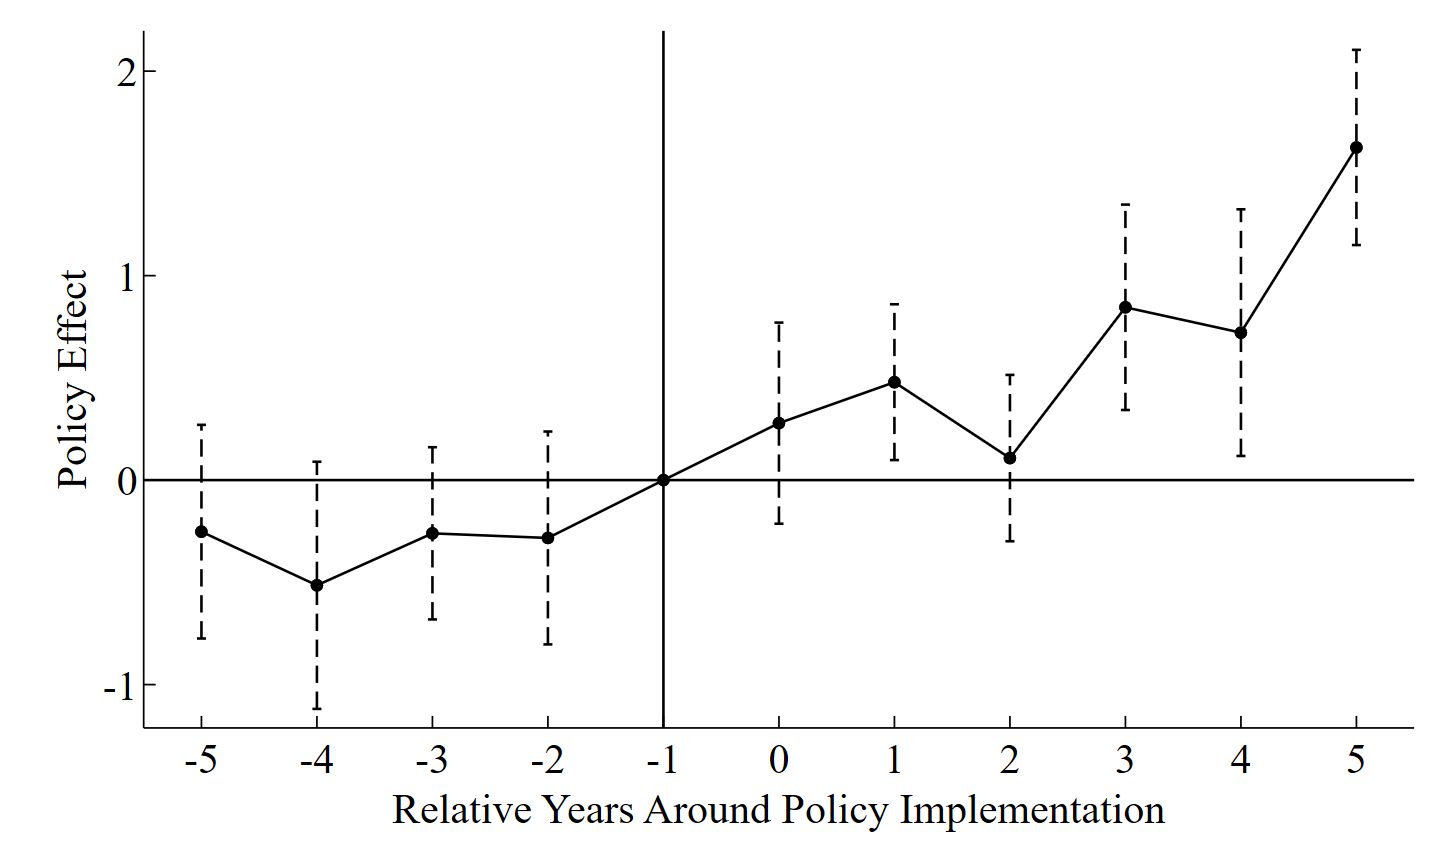


（b）Green Substantive Innovation

（a）Green Innovation

Figure 1

# Appendix 4

Table 3 Results of the Balance Test

| Variable | Sample | Mean | | Standard Error (%) | Absolute  Reduction in Standard Error(%) | t-Test | |
| --- | --- | --- | --- | --- | --- | --- | --- |
| Treatment Group | Control Group | t-Value | p-Value |
| *Size* | Unmatched | 8.4499 | 8.3951 | 4.30 | 66.90 | 3.820 | 0 |
| Matched | 8.4360 | 8.4179 | 1.40 | 1.110 | 0.265 |
| *Lev* | Unmatched | 0.4034 | 0.4107 | -3.70 | 91.50 | -3.320 | 0.001 |
| Matched | 0.4054 | 0.4048 | 0.30 | 0.250 | 0.801 |
| *Roe* | Unmatched | 0.0529 | 0.0524 | 0.30 | -80.40 | 0.300 | 0.767 |
| Matched | 0.0545 | 0.0537 | 0.60 | 0.480 | 0.631 |
| *Cash* | Unmatched | 0.0484 | 0.0526 | -6.50 | 96.60 | -5.820 | 0 |
| Matched | 0.0510 | 0.0509 | 0.20 | 0.180 | 0.860 |
| *Density* | Unmatched | 2.3279 | 2.2120 | 7.70 | 77.10 | 6.860 | 0 |
| Matched | 2.2323 | 2.2588 | -1.80 | -1.430 | 0.151 |
| *Growth* | Unmatched | 0.1351 | 0.1255 | 3.40 | 83.60 | 3.030 | 0.002 |
| Matched | 0.1332 | 0.1316 | 0.60 | 0.440 | 0.659 |
| *TFP* | Unmatched | 8.425 | 8.3200 | 10.30 | 92.90 | 9.230 | 0 |
| Matched | 8.373 | 8.3654 | 0.70 | 0.590 | 0.558 |

Probability density distribution of propensity scores after propensity score.


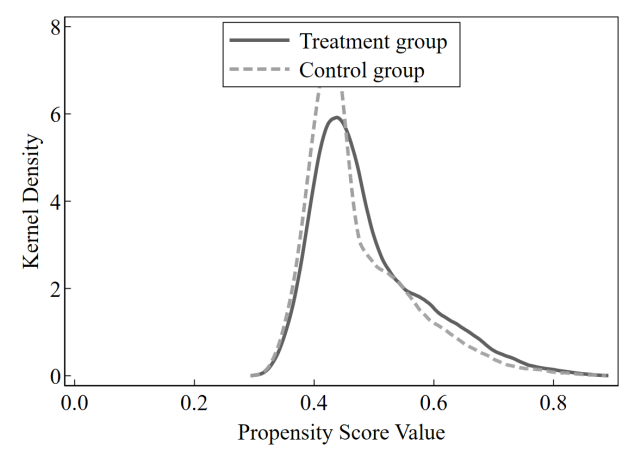


Figure 2 Kernel Density Distribution of Propensity Scores after Propensity Score Matching

# Appendix 5

A detailed explanation of how the impact of policies during the same period was excluded.

1. Green Credit Guidelines

Issued by the former China Banking Regulatory Commission in 2012, the Green Credit Guidelines systematically links banks’ credit decisions with firms’ environmental performance, serving as the first official normative document governing green credit businesses.Referring to the Classification Catalogue for Environmental Protection Verification of Listed Companies, Guidelines for Environmental Information Disclosure of Listed Companies and Industry Classification Guidelines for Listed Companies, this study defines restricted industries for green credit as follows: Mining (Industry Code: B06, B07, B08, B09), Manufacturing (Industry Code: C17, C19, C22, C25, C26, C28, C29, C30, C31), and Production and Supply of Electric Power and Heat Power (Industry Code: D44).Listed companies belonging to the above industries are defined as the treatment group of green credit restrictions (Gcres=1), while others are defined as the control group (Gcres=0). Policy is a time dummy variable, which equals 1 for observations in 2012 and thereafter, and 0 otherwise.

1. Green Finance Reform and Innovation Pilot Zones

In September 2015, the Central Committee of the Communist Party of China and the State Council issued the Overall Plan for the Reform of the Ecological Civilization System, which firstly proposed the construction of a green financial system. In 2016, seven government departments including the People’s Bank of China jointly released the Guidelines on Building a Green Financial System, making China the world’s first country to promote the development of a green financial system at the central government level.To facilitate policy implementation, eight pilot zones for green finance reform and innovation were officially launched in five provinces (autonomous regions) in June 2017, including Huzhou and Quzhou in Zhejiang Province, Guangzhou in Guangdong Province, Hami, Changji and Karamay in Xinjiang Uygur Autonomous Region, Gui’an New Area in Guizhou Province, and Ganjiang New Area in Jiangxi Province.Treat is a dummy variable equal to 1 if a firm is registered within the pilot zones, and 0 otherwise. Post is a time dummy variable equal to 1 for observations in 2017 and thereafter, and 0 otherwise.

# Appendix 6

Descriptive statistics for the mechanism variables; estimates of the mechanism variables' effects on Y.

Table 4 Descriptive Statistics of Mechanism Variables

| Variables | Obs | Mean | Std. | Min | Max | Med |
| --- | --- | --- | --- | --- | --- | --- |
| *FC* | 30490 | 0.4849 | 0.2811 | 0.0039 | 0.9520 | 0.5075 |
| *Greenwash* | 9839 | -0.0066 | 115.8161 | -419.8058 | 580.42 | -5.3972 |
| *RiskTake1* | 24998 | 6.0691 | 8.3487 | 0 | 575.2728 | 4.0961 |
| *RiskTake2* | 24998 | 2.8668 | 3.5508 | 0 | 145.4827 | 2.22198 |

Table 5 Regression Results of Financial Constraints and Greenwashing on Green Innovation

|  | (1)  *GI* | (2)  *GIi* | (1)  *GI* | (2)  *GIi* |
| --- | --- | --- | --- | --- |
| *FC* | -1.5040** | -1.6425*** |  |  |
|  | (0.6414) | (0.4085) |  |  |
| *Greenwash* |  |  | -0.0033** | -0.0027*** |
|  |  |  | (0.0014) | (0.0008) |
| *Size* | 0.0721 | 0.1316 | 0.2251 | 0.2366 |
|  | (0.3530) | (0.2895) | (0.6848) | (0.4553) |
| *Lev* | -0.9785 | -1.0645 | 0.4466 | -0.3086 |
|  | (0.8984) | (0.6908) | (1.5361) | (0.8834) |
| *Roe* | 0.3196 | 0.3909 | -0.4782 | 0.2024 |
|  | (0.7663) | (0.5914) | (1.2993) | (0.9108) |
| *Cash* | -1.7000 | -0.9210 | -0.4879 | -0.0512 |
|  | (1.2002) | (0.8075) | (2.8043) | (1.4616) |
| *Density* | 0.0855 | -0.0642 | -0.0958 | -0.0030 |
|  | (0.1234) | (0.1051) | (0.2879) | (0.1594) |
| *Growth* | 0.1820 | -0.1109 | -0.0527 | -0.1713 |
|  | (0.3308) | (0.2130) | (0.5873) | (0.4196) |
| *TFP* | -0.1343 | -0.1412 | -0.1251 | 0.1097 |
|  | (0.3728) | (0.3194) | (0.7804) | (0.4881) |
| *HHI* | -1.0094 | -3.1589** | -6.0439 | -5.4807** |
|  | (2.3444) | (1.3909) | (3.7718) | (2.1911) |
| *_cons* | 6.6615*** | 4.2763*** | 4.1664 | -0.0937 |
|  | (2.2265) | (1.4828) | (5.0513) | (3.0262) |
| Year FE | Yes | Yes | Yes | Yes |
| Firm FE | Yes | Yes | Yes | Yes |
| adj.R2 | 0.4214 | 0.3612 | 0.3439 | 0.3404 |
| N | 30537 | 30537 | 9659 | 9659 |

Table 6 Regression Results on the Impact of Risk-Taking on Green Innovation

|  | (1)  *GI* | (2)  *GIi* | (1)  *GI* | (2)  *GIi* |
| --- | --- | --- | --- | --- |
| *RiskTake1* | 0.0844** | 0.0567* |  |  |
|  | (0.0428) | (0.0298) |  |  |
| *RiskTake2* |  |  | 0.2130*** | 0.1358** |
|  |  |  | (0.0748) | (0.0538) |
| *Size* | 0.4497 | 0.4440 | 0.5181 | 0.4880 |
|  | (0.4385) | (0.2928) | (0.4390) | (0.3004) |
| *Lev* | 2.0395* | 0.5497 | 1.9030 | 0.4543 |
|  | (1.1794) | (0.9073) | (1.1750) | (0.9183) |
| *Roe* | 0.6411 | 0.6866 | 0.6662 | 0.6998 |
|  | (0.8454) | (0.5910) | (0.8459) | (0.6025) |
| *Cash* | -0.3172 | -0.2175 | -0.3389 | -0.2298 |
|  | (1.4329) | (1.1689) | (1.4336) | (1.1612) |
| *Density* | -0.3626** | -0.2640* | -0.2977* | -0.2221* |
|  | (0.1659) | (0.1372) | (0.1654) | (0.1315) |
| *Growth* | 0.0551 | -0.1521 | 0.0679 | -0.1448 |
|  | (0.3343) | (0.2610) | (0.3341) | (0.2562) |
| *TFP* | -0.7143* | -0.6055** | -0.6266 | -0.5442** |
|  | (0.4325) | (0.2811) | (0.4329) | (0.2684) |
| *HHI* | -0.0542 | -0.0199 | -0.2564 | -0.1612 |
|  | (5.0110) | (2.8299) | (4.9874) | (2.8480) |
| *_cons* | 7.2424** | 4.4636** | 5.7366* | 3.4752* |
|  | (2.9926) | (1.9393) | (3.0265) | (2.0250) |
| Year FE | Yes | Yes | Yes | Yes |
| Firm FE | Yes | Yes | Yes | Yes |
| adj.R2 | 0.4836 | 0.4234 | 0.4837 | 0.4234 |
| N | 24087 | 24087 | 24087 | 24087 |

# Appendix 7

Results of the heterogeneity analysis for the dependent variable green innovation.

Table 7 Heterogeneity analysis at the regional level

|  | (1)  regions with higher fiscal pressure | (2)  regions with lower fiscal pressure | (3)  financially developed regions | (4)  financially underdeveloped regions |
| --- | --- | --- | --- | --- |
| Regional Fiscal Pressure | | Financial Development Level | |
| *GSubsidy* | 0.3479* | 0.6440 | 0.8227** | -0.0661 |
|  | (0.1878) | (0.6859) | (0.3872) | (0.2531) |
| Year FE | Yes | Yes | Yes | Yes |
| Firm FE | Yes | Yes | Yes | Yes |
| adj.R2 | Yes | Yes | Yes | Yes |
| N | 0.4705 | 0.3248 | 0.4592 | 0.3729 |
| Year FE | 19954 | 7837 | 18575 | 12396 |

Table 8 Heterogeneity Analysis at the Industry Level

|  | (1)  Non-heavy Pollution | (2)  Heavy Pollution | (3)  Capital-intensive | (4)  Technology-intensive | （5）  Labor-intensive |
| --- | --- | --- | --- | --- | --- |
| Pollution Characteristics | | Industry Factor Intensity | | |
| *GSubsidy* | 0.6566** | -0.4290 | 1.0906** | 1.9350*** | 1.2658* |
|  | (0.2874) | (0.5077) | (0.5197) | (0.2822) | (0.6548) |
| Year FE | Yes | Yes | Yes | Yes | Yes |
| Firm FE | Yes | Yes | Yes | Yes | Yes |
| adj.R2 | Yes | Yes | Yes | Yes | Yes |
| N | 0.4708 | 0.3021 | 0.2482 | 0.5224 | 0.1025 |
| Year FE | 22016 | 9282 | 6462 | 13004 | 2269 |

Table 9 Heterogeneity Analysis at the Enterprise Level

|  | (1)  SOE | (2)  Non-SOE | (3)  Large-sized Enterprises | (4)  Small-sized Enterprises |
| --- | --- | --- | --- | --- |
| Enterprise Ownership Type | | Enterprise Size | |
| *GSubsidy* | 0.2109 | 0.5499* | 0.7019* | -0.0564 |
|  | (0.4861) | (0.3151) | (0.3832) | (0.4631) |
| Year FE | Yes | Yes | Yes | Yes |
| Firm FE | Yes | Yes | Yes | Yes |
| adj.R2 | Yes | Yes | Yes | Yes |
| N | 0.3778 | 0.4594 | 0.4259 | 0.4545 |
| Year FE | 9888 | 21359 | 13534 | 17435 |

# Appendix 8

Explanation of Heavy-Polluting Industries and Non-Heavy-Polluting Industries.

The classification of heavily polluting industries is based on the Industry Classification Guidelines for Listed Companies (revised in 2012) issued by the China Securities Regulatory Commission, the Classification Catalogue for Environmental Protection Verification of Listed Companies (Document No. Huanbanhan [2008] No. 373) and the Guidelines for Environmental Information Disclosure of Listed Companies (Document No. Huanbanhan [2010] No. 78) issued by the former Ministry of Environmental Protection. It covers 16 categories of heavily polluting industries including coal mining, mineral extraction, textile, leather making, papermaking, petrochemical, pharmaceutical, chemical, metallurgy and thermal power. Detailed classifications are presented in the table below.

Table 10 Classification of Heavily Polluting Industries

| Industry CodeIndustry Name | Industry CodeIndustry Name |
| --- | --- |
| B06 | Coal Mining and Washing |
| B07 | Extraction of Petroleum and Natural Gas |
| B08 | Ferrous Metal Ore Mining and Dressing |
| B09 | Non-Ferrous Metal Ore Mining and Dressing |
| C17 | Textile Industry |
| C19 | Leather, Fur, Feather and Related Products, and Footwear |
| C22 | Papermaking and Paper Products |
| C25 | Petroleum Processing, Coking and Nuclear Fuel Processing |
| C26 | Raw Chemical Materials and Chemical Products |
| C27 | Pharmaceutical Manufacturing |
| C28 | Chemical Fiber Manufacturing |
| C30 | Non-Metallic Mineral Products |
| C31 | Smelting and Pressing of Ferrous Metals |
| C32 | Smelting and Pressing of Non-Ferrous Metals |
| C33 | Metal Products |
| D44 | Production and Supply of Electric Power and Heat Power |
